# Supplementary material for: Effect of Tafamidis on Cardiac Function in Patients With Transthyretin Amyloid Cardiomyopathy: A Post Hoc Analysis of the ATTR-ACT Randomized Clinical Trial
Source: PubMed Central journal article supplement — JAMA Cardiol. 2023 Nov 15;9(1):25–34. doi: 10.1001/jamacardio.2023.4147 (PMC10652219; doi:10.1001/jamacardio.2023.4147), 2023-11-15
Supplement: jamacardiol-e234147-s002.pdf [file jamacardiol-e234147-s002.pdf]

## Supplemental Online Content

Shah SJ, Fine N, Garcia-Pavia P, et al. Effect of tafamidis on cardiac function in patients with transthyretin amyloid cardiomyopathy: a post hoc analysis of the ATTR-ACT randomized clinical trial. *JAMA Cardiol*. Published online November 15, 2023. doi:10.1001/jamacardio.2023.4147

**eTable 1.** Change From Baseline to Month 30 in Echocardiographic Segmental Strain

Measures: Tafamidis, 80 mg, vs Placebo

**eTable 2.** Change From Baseline to Month 30 in Left Atrial Diameter: Tafamidis, 80 mg, vs Placebo

This supplementary material has been provided by the authors to give readers additional information about their work.

**eTable 1.** Change From Baseline to Month 30 in Echocardiographic Segmental Strain Measures: Tafamidis, 80 mg, vs Placebo

| Segmental Strain Measure              | Treatment Group | Baseline |              | Change from Baseline, Month 30 |              | Between-group LS mean difference (95% CI) | P value | Interpretation of between-group difference in change |
|---------------------------------------|-----------------|----------|--------------|--------------------------------|--------------|-------------------------------------------|---------|------------------------------------------------------|
|                                       |                 | N        | Mean (SD)    | N                              | LS mean (SE) |                                           |         |                                                      |
| Basal septal longitudinal strain, %   | Tafamidis 80 mg | 173      | -4.8 (2.9)   | 105                            | 0.47 (0.26)  | -0.03<br>(-0.68, 0.61)                    | .92     | No difference                                        |
|                                       | Placebo         | 173      | -4.9 (3.0)   | 81                             | 0.50 (0.31)  |                                           |         |                                                      |
| Mid septal longitudinal strain, %     | Tafamidis 80 mg | 173      | -7.2 (3.9)   | 105                            | 0.02 (0.34)  | -1.84<br>(-2.79, -0.89)                   | <.001   | Tafamidis prevented worsening                        |
|                                       | Placebo         | 173      | -7.5 (3.8)   | 81                             | 1.86 (0.34)  |                                           |         |                                                      |
| Apical septal longitudinal strain, %  | Tafamidis 80 mg | 173      | -18.7 (7.7)  | 105                            | 2.67 (0.60)  | -1.52<br>(-3.51, 0.47)                    | .13     | No difference                                        |
|                                       | Placebo         | 173      | -19.3 (7.9)  | 81                             | 4.20 (0.92)  |                                           |         |                                                      |
| Basal lateral longitudinal strain, %  | Tafamidis 80 mg | 173      | -7.1 (4.1)   | 105                            | 0.61 (0.39)  | -1.36<br>(-2.55, -0.16)                   | .03     | Tafamidis prevented worsening                        |
|                                       | Placebo         | 173      | -7.3 (4.6)   | 81                             | 1.97 (0.43)  |                                           |         |                                                      |
| Mid lateral longitudinal strain, %    | Tafamidis 80 mg | 173      | -8.6 (5.1)   | 105                            | 0.01 (0.45)  | -0.70<br>(-1.77, 0.37)                    | .20     | No difference                                        |
|                                       | Placebo         | 173      | -7.9 (4.5)   | 81                             | 0.71 (0.42)  |                                           |         |                                                      |
| Apical lateral longitudinal strain, % | Tafamidis 80 mg | 173      | -15.8 (7.0)  | 105                            | 2.11 (0.47)  | -0.23<br>(-2.32, 1.85)                    | .83     | No difference                                        |
|                                       | Placebo         | 173      | -16.3 (7.1)  | 81                             | 2.35 (0.99)  |                                           |         |                                                      |
| Basal circumferential strain, %       | Tafamidis 80 mg | 159      | -11.7 (5.8)  | 94                             | -0.49 (0.77) | -1.95<br>(-4.14, 0.24)                    | .08     | No difference                                        |
|                                       | Placebo         | 160      | -12.4 (6.6)  | 69                             | 1.46 (0.66)  |                                           |         |                                                      |
| Mid circumferential strain, %         | Tafamidis 80 mg | 165      | -16.9 (8.6)  | 101                            | -0.76 (0.82) | -2.92<br>(-4.77, -1.07)                   | .002    | Tafamidis prevented worsening                        |
|                                       | Placebo         | 172      | -16.8 (9.6)  | 79                             | 2.17 (0.65)  |                                           |         |                                                      |
| Apical circumferential strain, %      | Tafamidis 80 mg | 157      | -20.1 (10.2) | 86                             | -2.28 (1.12) | -3.07<br>(-5.56, -0.59)                   | .02     | Improved with tafamidis                              |
|                                       | Placebo         | 156      | -20.0 (10.6) | 69                             | 0.79 (1.14)  |                                           |         |                                                      |
| Basal radial strain, %                | Tafamidis 80 mg | 157      | 10.2 (8.3)   | 92                             | 1.62 (1.15)  | 0.96<br>(-1.96, 3.89)                     | .52     | No difference                                        |
|                                       | Placebo         | 160      | 11.3 (7.7)   | 68                             | 0.65 (1.55)  |                                           |         |                                                      |
| Mid radial strain, %                  | Tafamidis 80 mg | 165      | 18.7 (11.6)  | 101                            | -0.11 (1.02) | 3.91<br>(0.97, 6.84)                      | .009    | Tafamidis prevented worsening                        |
|                                       | Placebo         | 171      | 17.6 (10.4)  | 79                             | -4.02 (1.13) |                                           |         |                                                      |
| Apical radial strain, %               | Tafamidis 80 mg | 157      | 18.0 (11.4)  | 83                             | 1.78 (1.44)  | 4.27<br>(0.17, 8.38)                      | .04     | Tafamidis prevented worsening                        |
|                                       | Placebo         | 156      | 17.2 (12.0)  | 69                             | -2.50 (1.80) |                                           |         |                                                      |

Abbreviations: CI, confidence interval; LS, least squares; SD, standard deviation; SE, standard error

**eTable 2.** Change From Baseline to Month 30 in Left Atrial Diameter: Tafamidis, 80 mg, vs Placebo

| Left Atrial Diameter Measure                | Treatment Group | Baseline |            | Change from Baseline, Month 30 |              | Between-group LS mean difference (95% CI) | P value | Interpretation of between-group difference in change |
|---------------------------------------------|-----------------|----------|------------|--------------------------------|--------------|-------------------------------------------|---------|------------------------------------------------------|
|                                             |                 | N        | Mean (SD)  | N                              | LS mean (SE) |                                           |         |                                                      |
| Left atrial anterior-posterior diameter, mm | Tafamidis 80 mg | 169      | 43.9 (7.1) | 102                            | -2.11 (0.59) | -1.13<br>(-3.06, 0.79)                    | .25     | No difference                                        |
|                                             | Placebo         | 176      | 43.7 (6.1) | 83                             | -0.98 (0.77) |                                           |         |                                                      |
| Left atrial medio-lateral diameter, mm      | Tafamidis 80 mg | 173      | 44.6 (6.4) | 107                            | -1.68 (0.58) | 0.04<br>(-1.54, 1.61)                     | .96     | No difference                                        |
|                                             | Placebo         | 177      | 44.6 (6.2) | 85                             | -1.72 (0.53) |                                           |         |                                                      |
| Left atrial superior-inferior diameter, mm  | Tafamidis 80 mg | 173      | 63.8 (7.7) | 107                            | -1.59 (0.84) | -1.13<br>(-3.98, 1.71)                    | .43     | No difference                                        |
|                                             | Placebo         | 177      | 64.2 (7.5) | 85                             | -0.46 (1.21) |                                           |         |                                                      |

Abbreviations: CI, confidence interval; LS, least squares; SD, standard deviation; SE, standard error
