# Supplementary material for: Effect of Tafamidis on Cardiac Function in Patients With Transthyretin Amyloid Cardiomyopathy: A Post Hoc Analysis of the ATTR-ACT Randomized Clinical Trial
Source: PubMed Central journal article supplement — JAMA Cardiol. 2023 Nov 15;9(1):25–34. doi: 10.1001/jamacardio.2023.4147 (PMC10652219; doi:10.1001/jamacardio.2023.4147), 2023-11-15
Supplement: jamacardiol-e234147-s003.pdf [file jamacardiol-e234147-s003.pdf]

## Data Sharing Statement

Shah. Effect of Tafamidis on Cardiac Function in Patients With Transthyretin Amyloid Cardiomyopathy. *JAMA Cardiol.* Published November 15, 2023.  
doi:10.1001/jamacardio.2023.4147

### Data

**Data available:** Yes

**Data types:** Deidentified participant data

**How to access data:** Upon request, and subject to review, Pfizer will provide the data that support the findings of this study. Subject to certain criteria, conditions and exceptions, Pfizer may also provide access to the related individual anonymized participant data. See <https://www.pfizer.com/science/clinical-trials/trial-data-and-results> for more information.

**When available:** With publication

### Supporting Documents

**Document types:** None

### Additional Information

**Who can access the data:** Upon request, and subject to review, Pfizer will provide the data that support the findings of this study. Subject to certain criteria, conditions and exceptions, Pfizer may also provide access to the related individual anonymized participant data. See <https://www.pfizer.com/science/clinical-trials/trial-data-and-results> for more information.

**Types of analyses:** Upon request, and subject to review, Pfizer will provide the data that support the findings of this study. Subject to certain criteria, conditions and exceptions, Pfizer may also provide access to the related individual anonymized participant data. See <https://www.pfizer.com/science/clinical-trials/trial-data-and-results> for more information.

**Mechanisms of data availability:** Upon request, and subject to review, Pfizer will provide the data that support the findings of this study. Subject to certain criteria, conditions and exceptions, Pfizer may also provide access to the related individual anonymized participant data. See <https://www.pfizer.com/science/clinical-trials/trial-data-and-results> for more information.
